# Supplementary material for: Molecular and Morphometric Update on Italian Salicornia (Chenopodiaceae), with a Focus on the Species S. procumbens s. l
Source: MDPI journal article supplement (doi:10.3390/plants12020375), 2023-01-13
Supplement: s1 [file s1]

## Alignment between all the *psbA-trnH* haplotypes

```
Haplotype5      CTAGACCTAGCGGCTATTGAAGCTCCATCTACAAATGGATAAAAGTTTCATTTTTAGTTTA
Haplotype1      CTAGACCTAGCTGCTATTGAAGCTCCATCTACAAATGGATAAAAGTTTCATTTTTAGTTTA
Haplotype2      CTAGACCTAGCTGCTATTGAAGCTCCATCTACAAATGGATAAAAGTTTCATTTTTAGTTTA
Haplotype3      CTAGACCTAGCTGCTATTGAAGCTCCATCTACAAATGGATAAAAGTTTCATTTTTAGTTTA
Haplotype4      CTAGACCTAGCTGCTATTGAAGCTCCATCTACAAATGGATAAAAGTTTCATTTTTAGTTTA
                  *****

Haplotype5      GTGTATTTCGAGTTATTGAATGTAAAGGGGCAGTGCTGGTTTCTTGTTCTGTCAAGAAATT
Haplotype1      GTGTATTTCGAATT----AATGTAAAGGGGCAGTGCTGGTTTCTTGTTCTGTCAAGAAATT
Haplotype2      GTGTATTTCGAATT----AATGTAAAGGGGCAGTGCTGGTTTCTTGTTCTGTCAAGAAATT
Haplotype3      GTGTATTTCGAATT----AATGTAAAGGGGCAGTGCTGGTTTCTTGTTCTGTCAAGAAATT
Haplotype4      GTGTATTTCGAATT----AATGTAAAGGGGCAGTGCTGGTTTCTTGTTCTGTCAAGAAATT
                  ***** **

Haplotype5      GGTATTGCTCCTTTTACT-----ATTCCAATTTA--TATATATAAGTTTTTAATTTCTT
Haplotype1      GGTATTGCTCCTTTTACTCGTCCAATCCAATTTAATTTATATATAAGTTTTTAATTTATT
Haplotype2      GGTATTGCTCCTTTTACTCGTCCAATCCAATTTAATTTATCTATAAGTTTTTAATTTATT
Haplotype3      GGTATTGCTCCTTTTACTCGTCCAATCCAATTTAATTTATATATAAGTTTTTAATTTATT
Haplotype4      GGTATTGCTCCTTTTACTCGTCCAATCCAATTTAATTTATATATAAGTTTTTAATTTATT
                  ***** * ***** *** *****

Haplotype5      TATTCTAATTTATAATGCTTTTTTAAAAATTCTAATGCTTTTTTAAATAGGAAAACTAAG
Haplotype1      T-----ATTCTAATGCTTTTTTAAATAAGAAAACTAAG
Haplotype2      T-----ATTCTAATGCTTTTTTAAATAAGAAAACTAAG
Haplotype3      T-----ATTCTAATGCTTTTTTAAATAAGAAAACTAAG
Haplotype4      T-----ATTCTAATGCTTTTTTAAATAAGAAAACTAAG
                  * *****

Haplotype5      AATAATGTTTTCTATTTTTATTCTTTTTTATTTGATTTTCGGTATGATATTATTCTAGCTT
Haplotype1      AATAATGTTTTCTATTTTTATTCTTTTT----GATTTTCGGTATGATATTATTCTATCTT
Haplotype2      AATAATGTTTTCTATTTTTATTCTTTTT----GATTTTCGGTATGATATTATTCTAGCTT
Haplotype3      AATAATGTTTTCTATTTTTATTCTTTTT----GATTTTCGGTATGATATTATTCTAGCTT
Haplotype4      AATAATGTTTTCTATTTTTATTCTTTTT----GAATTCGGTATGATATTATTCTAGCTT
                  ***** ** *****

Haplotype5      TTTT-----
Haplotype1      TTTTGTAATTTTTTT-----TATTAATTTTTAATTATTAAATTATAATTCAAATTAAT
Haplotype2      TTTTGTAATTTTTTT-----TTATTAATTTAATAATTATAATTCAAATTAAT
Haplotype3      TTTTGTAATTTTTTTTTTATTAATTTTTAATTTAATTATTAAATTATAATTCAAATTAAT
Haplotype4      TTTTGTAATTTTTTTT-----TTATTAATTTAATTATTAAATTATAATTCAAATTAAT
                  ****

Haplotype5      -----TAATTAATTTTTT-----
Haplotype1      TAAACTTTTTTGTAATTAATTTATTAATT-ATTAATTA--ATTTATTAATATTAATTAAT
Haplotype2      TAAACTTTTTTGTAATTAATTTATTAATTAATTTATTAATATTAATTAATTAATTAAT
Haplotype3      TAAACTTTTTTGTAATTAATTTATTAATT-ATTAATTA--ATTTAT-----
Haplotype4      TAAACTTTTTTGTAATTAATTTATTAATT-ATTAATTA--ATTTAT-----
                  ***** **

Haplotype5      -----TATTAAGAATTAATAAAAGATTTATTAAAGATTTAATTTGTATAATAATTTAAT
Haplotype1      GAAAGATAATATTAATTAAGAAAGATCGATTAAAGATTAAGTTAGTATAATAATTACAT
Haplotype2      GAAAGATAATATTAATTAAGAAAGATCGATTAAAGATTAATTTAGTATAATAATTACAT
Haplotype3      -----TAATATTAATTAAGAAAGATCGATTAAAGATTAATTTAGTATAATAATTACAT
Haplotype4      -----TAATATTAATTAAGAAAGATCGATTAAAGATTAATTTAGTATAATAATTACAT
                  ** * ***** ***** ***** * ** *****

Haplotype5      TATTATACAGTTCATTTTTTTGTAAGTAAATTCGGATAAGAAAGGGGCGGATG-TAGCCA
Haplotype1      TATTATACAGTGAATTTGTTTGTAAGGAAATTCAGATAAGAAAGGGGCGGATG-TAGCCA
Haplotype2      TATTATACAGTGAATTTGTTTGTAAGGAAATTCAGATAAGAAAGGGGCGGATG-TAGCCA
Haplotype3      TATTATACAGTGAATTTG-TTGTAGGAAATTCAGATAAGAAAGGGGCGGATGTTAGCCA
```

|            |                                                                       |
|------------|-----------------------------------------------------------------------|
| Haplotype4 | TATTATACAGTGAATTTGTTTGTAAGGAAATTCAGATAAGAAAGGGGCGGATG-TAGCCA<br>***** |
| Haplotype5 | AGTGGATCAAGGCA                                                        |
| Haplotype1 | AGTGGATCAAGGCA                                                        |
| Haplotype2 | AGTGGATCAAGGCA                                                        |
| Haplotype3 | AGTGGATCAAGGCA                                                        |
| Haplotype4 | AGTGGATCAAGGCA<br>*****                                               |

#### Alignment between *psbA-trnH* haplotypes 1 and 2

|            |                                                                          |
|------------|--------------------------------------------------------------------------|
| Haplotype1 | CTAGACCTAGCTGCTATTGAAGCTCCATCTACAAATGGATAAAGTTTCATTTTTAGTTTA             |
| Haplotype2 | CTAGACCTAGCTGCTATTGAAGCTCCATCTACAAATGGATAAAGTTTCATTTTTAGTTTA<br>*****    |
| Haplotype1 | GTGTATTCGAATTAATGTAAAGGGGCAGTGCTGGTTTCTTGTTCTGTCAAGAAATTGGTT             |
| Haplotype2 | GTGTATTCGAATTAATGTAAAGGGGCAGTGCTGGTTTCTTGTTCTGTCAAGAAATTGGTT<br>*****    |
| Haplotype1 | ATTGCTCCTTTACTCGTCCAATCCAATTTAATTTATATATAAGTTTTTAATTTATTTATT             |
| Haplotype2 | ATTGCTCCTTTACTCGTCCAATCCAATTTAATTTATCTATAAGTTTTTAATTTATTTATT<br>*****    |
| Haplotype1 | CTAATGCTTTTTTAAATAAGAAAACTAAGAATAATGTTTTCTATTTTTATTCTTTTTGA              |
| Haplotype2 | CTAATGCTTTTTTAAATAAGAAAACTAAGAATAATGTTTTCTATTTTTATTCTTTTTGA<br>*****     |
| Haplotype1 | TTTCGGTATGATATTATTCTATCTTTTTTGTA-TTTTTTTTATTAATTTTTAATTATTA              |
| Haplotype2 | TTTCGGTATGATATTATTCTAGCTTTTTTGTAATTTTTTTTTATTAA--TTTAAT-----<br>*****    |
| Haplotype1 | AATTATAATTCAAATTAATAAACTTTTTTGTAATTAATTTATT----ATTTATTAATT               |
| Haplotype2 | AATTATAATTCAAATTAATAAACTTTTTTGTAATTAATTTATTAATTAATTTATTAAT-<br>*****     |
| Haplotype1 | AATTTATTAATATTAATTAAAGAAAGATAATATTAATTAAGAAAGATCGATTAAAGATT              |
| Haplotype2 | -ATTAATTAATATTAATTAAAGAAAGATAATATTAATTAAGAAAGATCGATTAAAGATT<br>*** ***** |
| Haplotype1 | AAGTTAGTATAATAATTACATTATTATACAGTGAATTTGTTTGTAAGGAAATTCAGATAA             |
| Haplotype2 | AAATTAGTATAATAATTACATTATTATACAGTGAATTTGTTTGTAAGGAAATTCAGATAA<br>** ***** |
| Haplotype1 | GAAAGGGGCGGATGTAGCCAAGTGGATCAAGGCA                                       |
| Haplotype2 | GAAAGGGGCGGATGTAGCCAAGTGGATCAAGGCA<br>*****                              |

#### Alignment between *psbA-trnH* haplotypes 3 (=SR2) and 4 (=SR4)

|     |                                                                       |
|-----|-----------------------------------------------------------------------|
| SR4 | CTAGACCTAGCTGCTATTGAAGCTCCATCTACAAATGGATAAAGTTTCATTTTTAGTTTA          |
| SR2 | CTAGACCTAGCTGCTATTGAAGCTCCATCTACAAATGGATAAAGTTTCATTTTTAGTTTA<br>***** |
| SR4 | GTGTATTCGAATTAATGTAAAGGGGCAGTGCTGGTTTCTTGTTCTGTCAAGAAATTGGTT          |
| SR2 | GTGTATTCGAATTAATGTAAAGGGGCAGTGCTGGTTTCTTGTTCTGTCAAGAAATTGGTT<br>***** |
| SR4 | ATTGCTCCTTTACTCGTCCAATCCAATTTAATTTATATATAAGTTTTTAATTTATTTATT          |
| SR2 | ATTGCTCCTTTACTCGTCCAATCCAATTTAATTTATATATAAGTTTTTAATTTATTTATT          |

\*\*\*\*\*

SR4 CTAATGCTTTTTTAAATAAGAAAACTAAGAATAATGTTTTCTATTTTATTCTTTTTGA  
SR2 CTAATGCTTTTTTAAATAAGAAAACTAAGAATAATGTTTTCTATTTTATTCTTTTTGA  
\*\*\*\*\*

SR4 ATTCGGTATGATATTATTCTAGCTTTTTTGTAATTTTTTTTTTA-----TTAATTTTAA  
SR2 TTTCGGTATGATATTATTCTAGCTTTTTTGTAATTTTTTTTTTATTAATTTTAAATTTTAA  
\*\*\*\*\*

SR4 TTATTAAATTATAAATTCAAAATTAATAAACTTTTTTGTAATTAATTTATTAATTATTAAT  
SR2 TTATTAAATTATAAATTCAAAATTAATAAACTTTTTTGTAATTAATTTATTAATTATTAAT  
\*\*\*\*\*

SR4 TAATTTATTAATATTAATTAAGAAAGATCGATTAAAGATTAAATTAGTATAATAATTAC  
SR2 TAATTTATTAATATTAATTAAGAAAGATCGATTAAAGATTAAATTAGTATAATAATTAC  
\*\*\*\*\*

SR4 ATTATTATACAGTGAATTTGTTTGTAAGGAAATTCAGATAAGAAAGGGCGGATG-TAGC  
SR2 ATTATTATACAGTGAATTTG-TTGTAAGGAAATTCAGATAAGAAAGGGCGGATGTTAGC  
\*\*\*\*\*

SR4 CAAGTGGATCAAGGCA  
SR2 CAAGTGGATCAAGGCA  
\*\*\*\*\*
